# Supplementary material for: Detection of hydrogen peroxide using dioxazaborocanes: elucidation of the sensing mechanism at the molecular level by NMR and XPS measurements
Source: Royal Society of Chemistry journal article supplement (doi:10.1039/d0nj00038h), 2020-01-01
Supplement: d0nj00038h1.pdf [file d0nj00038h1.pdf]

## Detection of Hydrogen Peroxide using Dioxazaborocanes: Elucidation of the Sensing Mechanism at the Molecular Level by NMR and XPS Measurements

Thomas Caron, Pascal Palmas, Céline Frénois, Christophe Méthivier, Eric Pasquinet, Claire-Marie Pradier, Françoise Serein-Spirau, Lionel Hairault and Pierre Montméat

New Journal of Chemistry

Supporting information:

**Figure S1.**  $^{11}\text{B}$  NMR spectra of Dioxazaborocane 2 in  $\text{CDCl}_3$  before and after 48 h of exposure to HP.

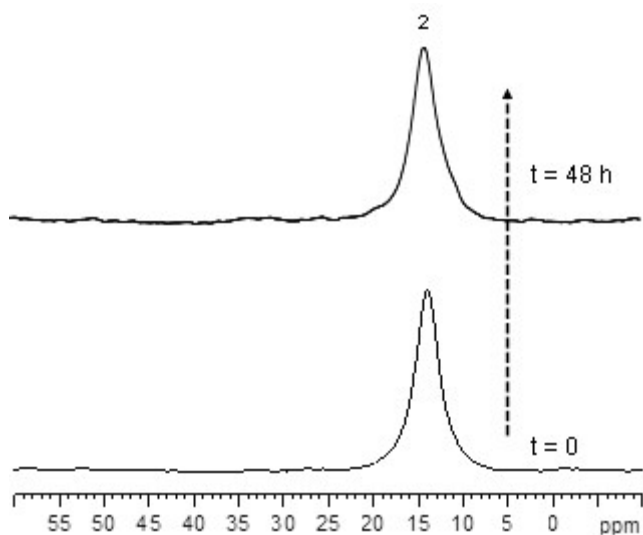

**Table S1.** Dioxazaborocane **2** characterization

|                                                   |                                                                                                                                                                                |
|---------------------------------------------------|--------------------------------------------------------------------------------------------------------------------------------------------------------------------------------|
| M.p                                               | 257°C                                                                                                                                                                          |
| <sup>1</sup> H NMR (400 MHz, CDCl <sub>3</sub> )  | δ = 8.50 (s, 1 H, CH), 8.03 (m, 6 H, CH), 7.50 (m, 7 H, CH), 4.61 (s, 2 H, CH <sub>2</sub> ), 4.21 (t, 4 H, CH <sub>2</sub> ), 2.96 (s, 4 H, CH <sub>2</sub> ) ppm             |
| <sup>13</sup> C NMR (100 MHz, CDCl <sub>3</sub> ) | δ=133.7, 132.13, 131.6, 130.1, 129.8, 128.3, 128.0, 127.2, 125.4, 124.6, 123.9, 63.0, 56.4, 51.8 ppm                                                                           |
| IR (ATR):                                         | ν̃=3049, 2982, 2938, 2889, 2855, 2835, 1622, 1590, 1522, 1493, 1446, 1433, 1357, 1211, 1155, 1084, 1067, 1010, 953, 895, 830, 795, 727, 705 cm <sup>-1</sup>                   |
| HRMS (M <sup>+</sup> *)                           | <i>m/z</i> found 381.1860 u., calculated for <sup>12</sup> C <sub>25</sub> <sup>1</sup> H <sub>24</sub> <sup>10</sup> B <sup>14</sup> N <sup>16</sup> O <sub>2</sub> 381.1905u |

**Table S2.** Crystallographic characteristics and X-Ray data collection and refinement statistics for Dioxazaborocane **2**.

| Parameter                             | Compound <b>2</b>                                                                          |
|---------------------------------------|--------------------------------------------------------------------------------------------|
| Molecular formula                     | C <sub>50</sub> H <sub>48</sub> B <sub>2</sub> N <sub>2</sub> O <sub>4</sub> (2 molecules) |
| Temperature (K)                       | 293                                                                                        |
| Crystal system                        | Monoclinic                                                                                 |
| Space group                           | <i>P</i> 2 <sub>1</sub> / <i>n</i>                                                         |
| <i>a</i> (Å)                          | 10.0855(6)                                                                                 |
| <i>b</i> (Å)                          | 22.4497(14)                                                                                |
| <i>c</i> (Å)                          | 17.1902(11)                                                                                |
| <i>a</i> (°)                          | 90                                                                                         |
| <i>b</i> (°)                          | 90.037(6)                                                                                  |
| <i>g</i> (°)                          | 90                                                                                         |
| <i>V</i> (Å <sup>3</sup> )            | 3892.1(4)                                                                                  |
| <i>Z</i>                              | 4                                                                                          |
| Crystal size (mm)                     | 0.3                                                                                        |
| <i>r</i> (gcm <sup>-3</sup> )         | 1.301                                                                                      |
| Radiation                             | Mo K $\alpha$                                                                              |
| $\lambda$ (Å)                         | 0.71073                                                                                    |
| Exp. resolution (Å)                   | 16.0143                                                                                    |
| <i>N</i> <sub>ref<sup>tot</sup></sub> | 13291                                                                                      |
| <i>N</i> <sub>ref<sup>ls</sup></sub>  | 8083                                                                                       |
| <i>N</i> <sub>par</sub>               | 523                                                                                        |
| <i>R</i> <sub>1</sub>                 | 0.1977                                                                                     |
| <i>wR</i> <sub>2</sub>                | 0.0654                                                                                     |
| GOF                                   | 1.0757                                                                                     |

**Comment S1.** Evaluation of the limit of detection of the device

Based on a previous article dedicated to the detection of TNT vapors using the same laboratory prototype [Talanta Volume 81, Issues 1–2, 15 April 2010, Pages 543-548], the limit of detection *L*<sub>d</sub> for hydrogen peroxide can be calculated.

We postulate a linear relationship between the response of the sensor and the hydrogen peroxide concentration. When exposed to 50 ppmv of HP, the response is 64 %.

$$Ld = \frac{3 \times \text{noise}}{\text{response}}$$

Ld is thus given according to  
It leads to Ld = 4 ppmv.

Concentration, with noise = 1.5 %.
